# Supplementary material for: Translation Elongation Factor 4 (LepA) Contributes to Tetracycline Susceptibility by Stalling Elongating Ribosomes
Source: PubMed Central journal article supplement (PMC6105825; doi:10.1128/aac.02356-17), 2018-07-27
Supplement: zac008187312s1.pdf [file zac008187312s1.pdf]

# Supplementary Materials for

## **Translation elongation factor 4 (LepA) contributes to tetracycline susceptibility by stalling elongating ribosomes**

Bin Liu<sup>a</sup>, Chunlai Chen<sup>a\*</sup>

*a, School of Life Sciences; Tsinghua-Peking Joint Center for Life Sciences; Beijing*

*Advanced Innovation Center for Structural Biology, Tsinghua University, Beijing, China.*

*\*Correspondence: [chunlai@mail.tsinghua.edu.cn](mailto:chunlai@mail.tsinghua.edu.cn)*

**Supplementary Table 1. Mechanism of the tested antibiotics**

| Antibiotic    | Mechanism of action                                                                                                                                                                                                                                                   |
|---------------|-----------------------------------------------------------------------------------------------------------------------------------------------------------------------------------------------------------------------------------------------------------------------|
| Streptomycin  | Interacts with 16S rRNA and ribosomal protein S12, which causes misreading of mRNA(1, 2).                                                                                                                                                                             |
| Tetracycline  | Prevents the attachment of aminoacyl-tRNA to the ribosomal acceptor (A) site(3).                                                                                                                                                                                      |
| Spectinomycin | Sterically blocks swiveling of the head domain of the small ribosomal subunit to disrupt translocation(4).                                                                                                                                                            |
| Puromycin     | Causes premature termination during translation. Part of the molecule resembles the 3' end of the aminoacylated tRNA. It enters the A site and transfers to the growing chain, causing the formation of a puromycylated nascent chain and premature chain release(5). |
| Erythromycin  | Binds to the nascent peptide exit tunnel close to the peptidyl transferase center and prevents synthesis of peptides longer than eight amino acid(6).                                                                                                                 |
| Hygromycin B  | Prevents movement of the A site bound tRNA into the P site with an overall net effect of sequestering tRNA in the A site(7).                                                                                                                                          |
| Gentamicin    | Binds the 30S subunits of the bacterial ribosome and assists read-through of termination codon(8).                                                                                                                                                                    |

**Supplementary Table 2. Primers used in sequencing library construction**

| Primer name                           | Sequence (5' to 3')                                                                                                                   |
|---------------------------------------|---------------------------------------------------------------------------------------------------------------------------------------|
| RTP                                   | 5'-(Phos)-AGATCGGAAGAGCGTCGTGTAGGGAAAGAGTGTAGATCTCGGTGGTCGC-(SpC18)-CACTCA-(SpC18)<br>) TTCAGACGTGTGCTCTTCCGATCTATTGATGG TGCCTACAG-3' |
| 5s-1                                  | 5'/_5Biosg/AGTTCGGCATGGGGTCAGGTGGGACCACCGCGCTAC_3'                                                                                    |
| 5s-2                                  | 5'/_5Biosg/CGCTACGGCGTTTCACTTCTGA_3'                                                                                                  |
| 5s-3                                  | 5'/_5Biosg/CTCTCGCATGGGGAGACCCACACTACCATCGGC_3'                                                                                       |
| 16s-1                                 | 5'/_5Biosg/CCACTCGTCAGCAAAGAAGCAAGCTTCTTCTGT_3'                                                                                       |
| 16s-2                                 | 5'/_5Biosg/GTCGCCTAGGTGAGCCGTTACCCACCTACTAGCT_3'                                                                                      |
| 16s-3                                 | 5'/_5Biosg/CCTCCGTAGGAGTCTGGACCGTGTCTCAGTTCAGTGTGGCTGG_3'                                                                             |
| 16s-4                                 | 5'/_5Biosg/GCCTCAAGGGCACAACCTCCAAGTCGACAT_3'                                                                                          |
| 23s-1                                 | 5'/_5Biosg/GGCATTGTGCTTCAGCACCGTAGTGCCTCGTCATCACGCCTCAG_3'                                                                            |
| 23s-2                                 | 5'/_5Biosg/TACCACGTGTCCCGCCCTACTCATCGAGCTCA_3'                                                                                        |
| 23s-3                                 | 5'/_5Biosg/TGTCCCGCCCTACTCATCGAGCTCACAAATATG_3'                                                                                       |
| 23s-4                                 | 5'/_5Biosg/CATAAGCGTCGCTGCCGAGCTTCGGTGCATGGTTTA_3'                                                                                    |
| Forward library PCR primer            | 5'-AATGATACGGCGACCACCGAGATCTACAC-3'                                                                                                   |
| Reverse PCR primer WT                 | 5'-CAAGCAGAAGACGGCATAACGAGATACTGATGTGACTGGAGTTCAGACGTGTGCTCTTCCG-3'                                                                   |
| Reverse PCR primer $\Delta$ EF4       | 5'-CAAGCAGAAGACGGCATAACGAGATATGCTGGTACTGGAGTTCAGACGTGTGCTCTTCCG-3'                                                                    |
| Reverse PCR primer WT tetra           | 5'-CAAGCAGAAGACGGCATAACGAGATACGTCGGTACTGGAGTTCAGACGTGTGCTCTTCCG-3'                                                                    |
| Reverse PCR primer $\Delta$ EF4 tetra | 5'-CAAGCAGAAGACGGCATAACGAGATAGCTGCGTACTGGAGTTCAGACGTGTGCTCTTCCG-3'                                                                    |
| linker                                | 5'-rAppCTGTAGGCACCATCAAT-NH2-3'                                                                                                       |

References:

1. **Finken M, Kirschner P, Meier A, Wrede A, Bottger EC.** 1993. Molecular-Basis of Streptomycin Resistance in Mycobacterium-Tuberculosis - Alterations of the Ribosomal-Protein S12 Gene and Point Mutations within a Functional 16s Ribosomal-Rna Pseudoknot. *Mol Microbiol* **9**:1239-1246.
2. **Fukuda M, Koga H, Ohno H, Yang B, Hirakata Y, Maesaki S, Tomono K, Tashiro T, Kohno S.** 1999. Relationship between genetic alteration of the rpsL gene and streptomycin susceptibility of Mycobacterium tuberculosis in Japan. *J Antimicrob Chemoth* **43**:281-284.
3. **Chopra I, Roberts M.** 2001. Tetracycline antibiotics: Mode of action, applications, molecular biology, and epidemiology of bacterial resistance. *Microbiol Mol Biol R* **65**:232-260.
4. **Borovinskaya MA, Shoji S, Holton JM, Fredric K, Cate JHD.** 2007. A steric block in translation caused by the antibiotic spectinomycin. *Acs Chem Biol* **2**:545-552.
5. **Pestka S.** 1971. Inhibitors of Ribosome Functions. *Annu Rev Microbiol* **25**:487-562.
6. **Lovmar M, Nilsson K, Vimberg V, Tenson T, Nervall M, Ehrenberg M.** 2006. The molecular mechanism of peptide-mediated erythromycin resistance. *J Biol Chem* **281**:6742-6750.
7. **Brodersen DE, Clemons WM, Carter AP, Morgan-Warren RJ, Wimberly BT, Ramakrishnan V.** 2000. The structural basis for the action of the antibiotics tetracycline, pactamycin, and hygromycin B on the 30S ribosomal subunit. *Cell* **103**:1143-1154.
8. **Bellais S, Le Goff C, Dagoneau N, Munnich A, Cormier-Daire V.** 2010. In vitro readthrough of termination codons by gentamycin in the Stuve-Wiedemann Syndrome. *Eur J Hum Genet* **18**:130-132.

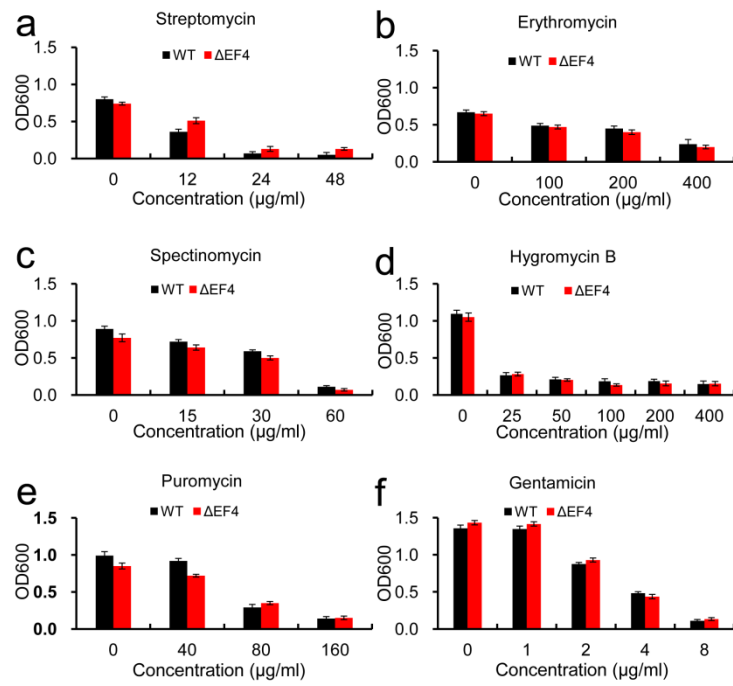

**Supplementary Fig. 1** Growth of the WT and  $\Delta$ EF4 strains under different concentrations of antibiotics, including streptomycin (a), erythromycin (b), spectinomycin (c), hygromycin B (d), puromycin (e), gentamicin (f).

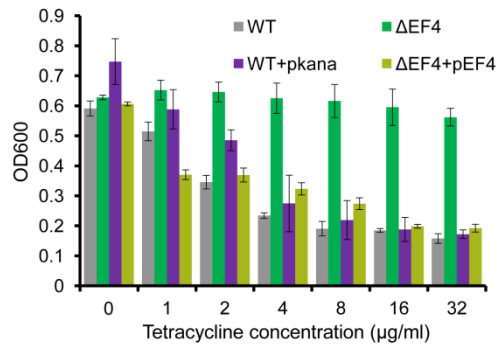

**Supplementary Fig. 2** Growth of the WT strain, the  $\Delta$ EF4 strain, the WT strain with an empty vector containing a kanamycin-resistant gene (pkana), and the  $\Delta$ EF4 strain with a plasmid expressing EF4 (pEF4) under different concentrations of tetracycline.

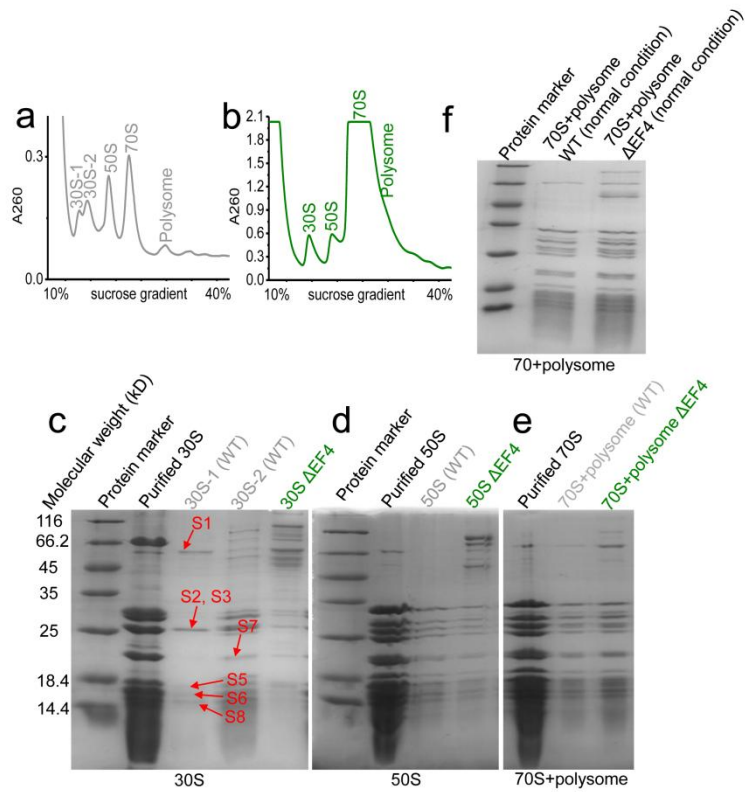

**Supplementary Fig. 3** Polysome profiles and SDS-PAGE of ribosome fractions. A-B, polysome profiles for the WT (a) and  $\Delta$ EF4 (b) strains that were treated with tetracycline. The polysome profiles were obtained by centrifuging at 40000 rpm for 3 hours in 10%-40% sucrose. C-F, SDS-PAGE of ribosome fractions prepared from strains treated with (c-e) or without (f) tetracycline.

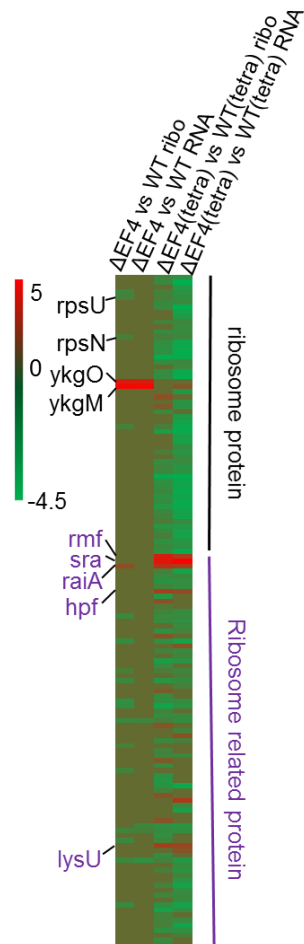

**Supplementary Fig. 4** Expression analysis of ribosomal proteins and ribosome related proteins between samples. The green and red colors stand for down- and up-regulation in the  $\Delta EF4$  strain, respectively. Ribo and RNA represent expression analysis at the translational and transcriptional levels, respectively.



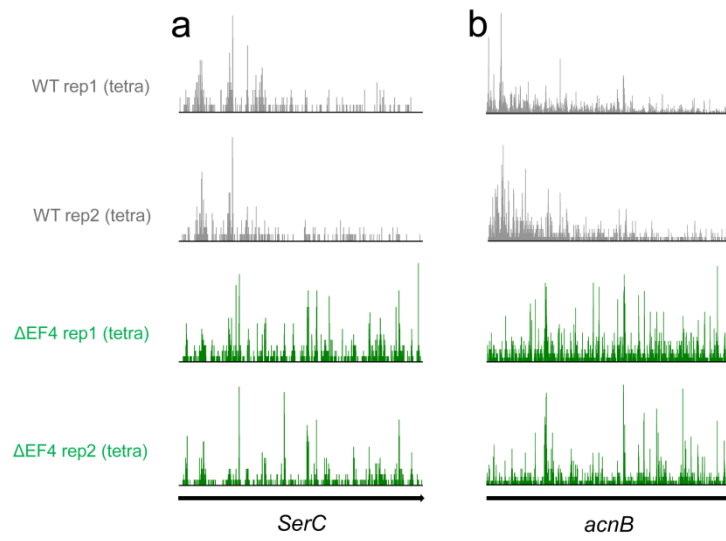

**Supplementary Fig. 5** Profiles of ribosomal footprints on mRNA for gene *SerC* (a) and *acnB* (b) in the WT and  $\Delta$ EF4 strains with tetracycline treatment.

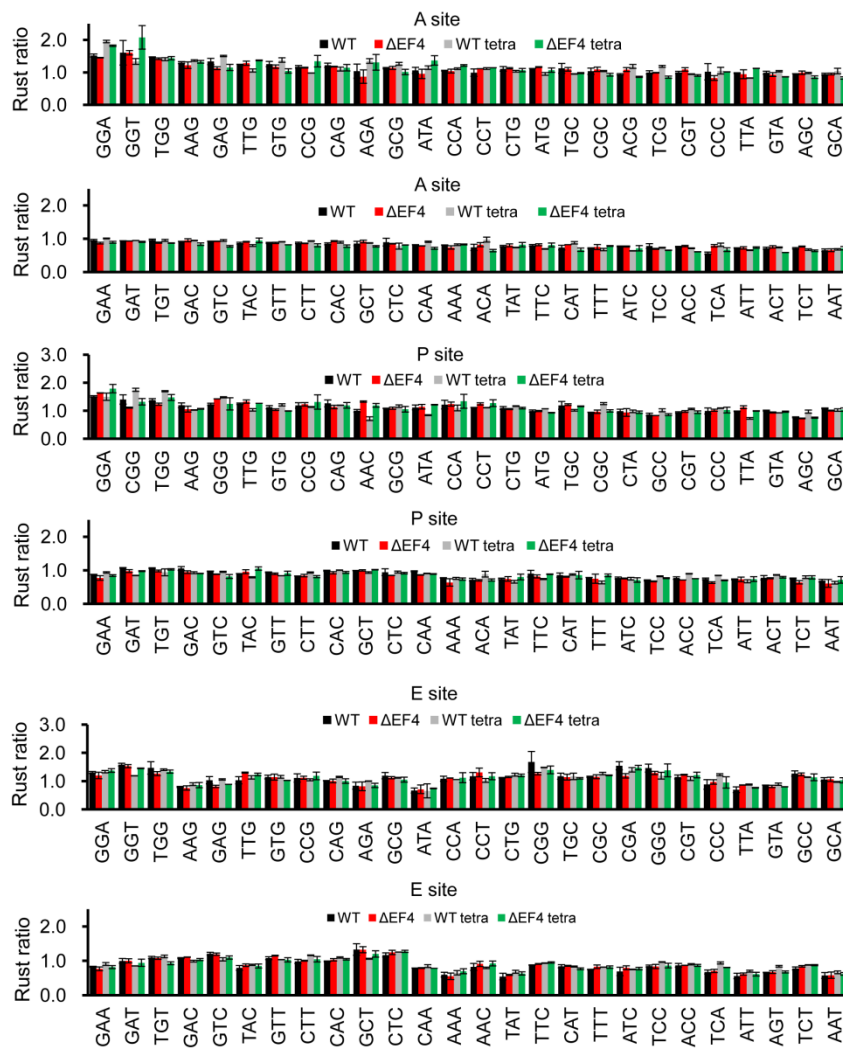

**Supplementary Fig. 6** The rust ratio values for the codons at A, P and E sites, which were not showed in Figure 4.

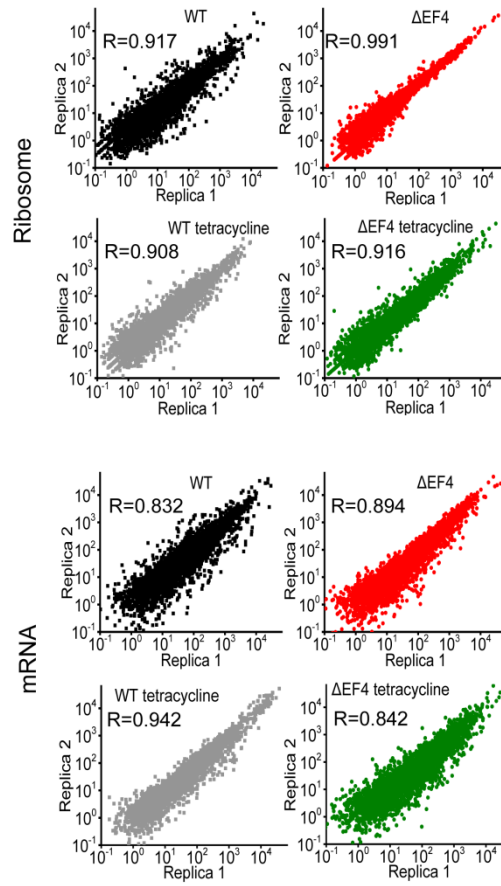

**Supplementary Fig. 7** Correlation between replicates in all samples for both ribosomal footprints and mRNA data sets.
